# Supplementary material for: Constructing a 1T-MoS2/Ni3S4heterostructure to balance water dissociation and hydroxyl desorption for efficient hydrogen evolution
Source: Royal Society of Chemistry journal article supplement (doi:10.1039/d3cy00616f), 2023-01-01
Supplement: d3cy00616f1.pdf [file d3cy00616f1.pdf]

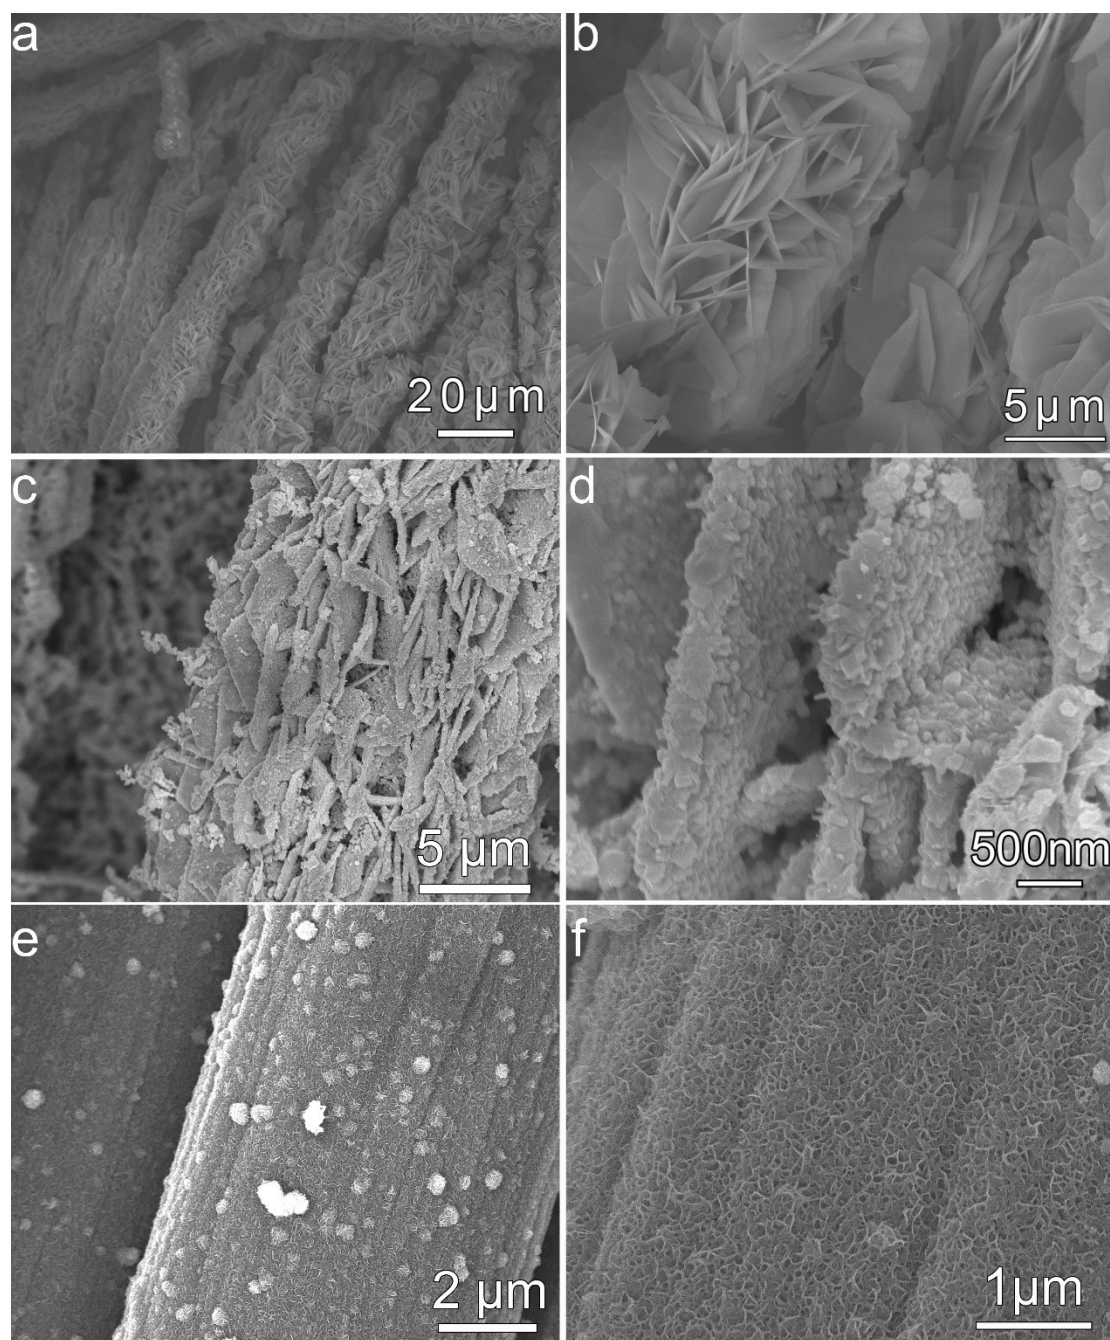

Figure S1. SEM image of (a, b) Ni(OH)<sub>2</sub>/CC, (c, d) Ni<sub>3</sub>S<sub>4</sub>/CC, (e, f) 1T-MoS<sub>2</sub>/CC.

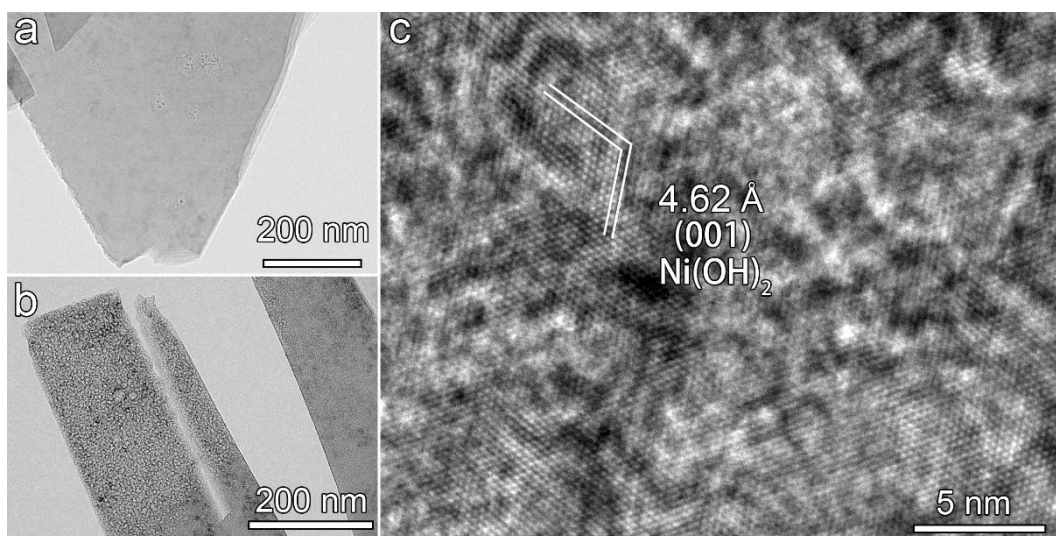

Figure S2. TEM image of Ni(OH)<sub>2</sub>/CC.

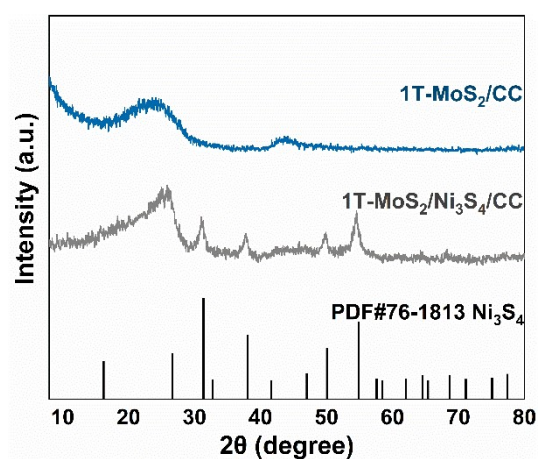

Figure S3. The XRD pattern of 1T-MoS<sub>2</sub>/CC and 1T-MoS<sub>2</sub>/Ni<sub>3</sub>S<sub>4</sub>/CC.

The XRD pattern shown that no distinct peaks for 1T-MoS<sub>2</sub> were observed, indicating that the 1T-MoS<sub>2</sub> in both catalysts has a poor crystallinity.

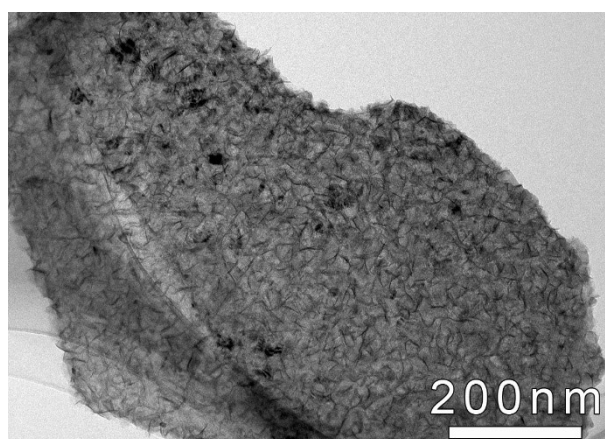

Figure S4. TEM image of 1T-MoS<sub>2</sub>/Ni<sub>3</sub>S<sub>4</sub>/CC.

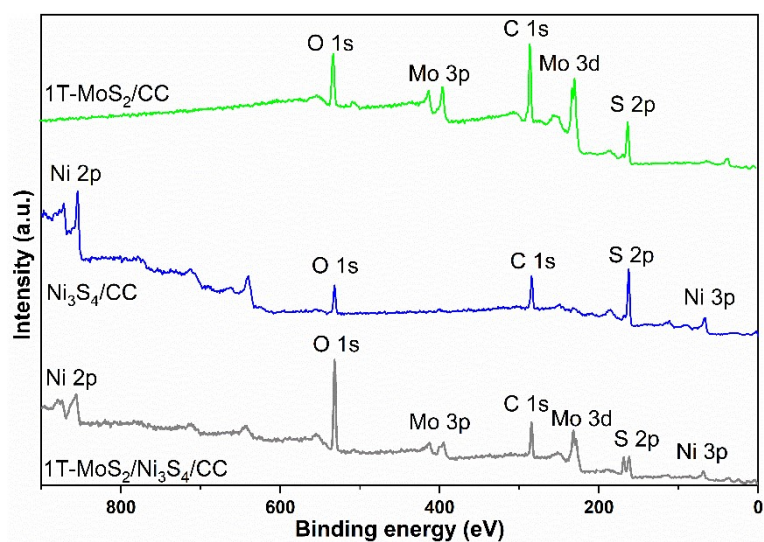

Figure S5. XPS survey of 1T-MoS<sub>2</sub>/CC, Ni<sub>3</sub>S<sub>4</sub>/CC and 1T-MoS<sub>2</sub>/Ni<sub>3</sub>S<sub>4</sub>/CC.

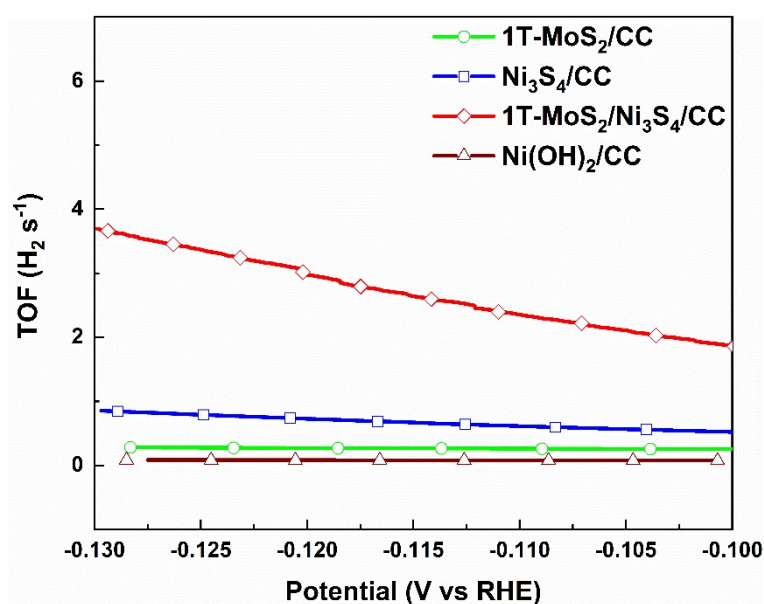

Figure S6. The TOF of 1T-MoS<sub>2</sub>/CC, Ni<sub>3</sub>S<sub>4</sub>/CC, Ni(OH)<sub>2</sub>/CC and 1T-MoS<sub>2</sub>/Ni<sub>3</sub>S<sub>4</sub>/CC.

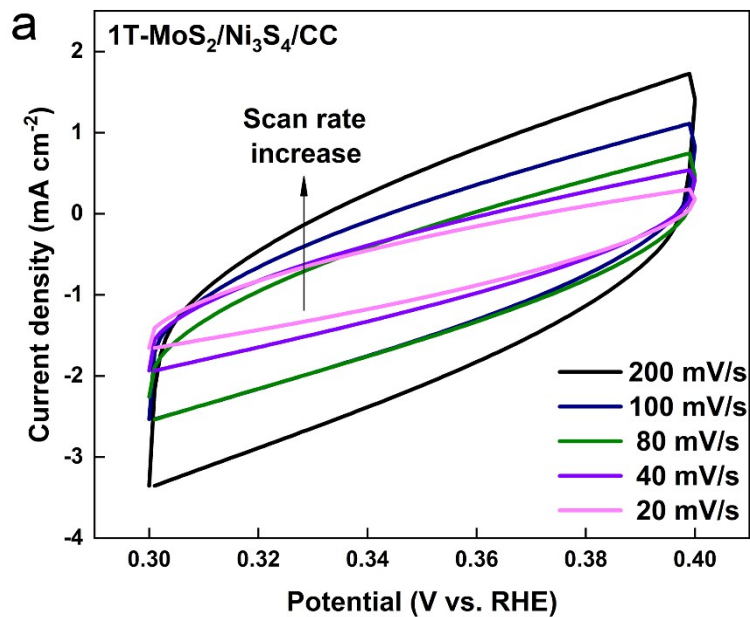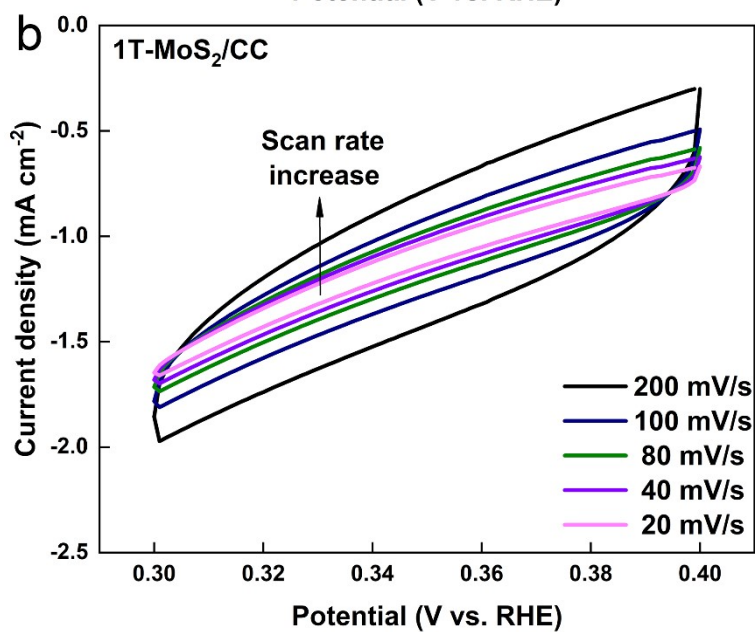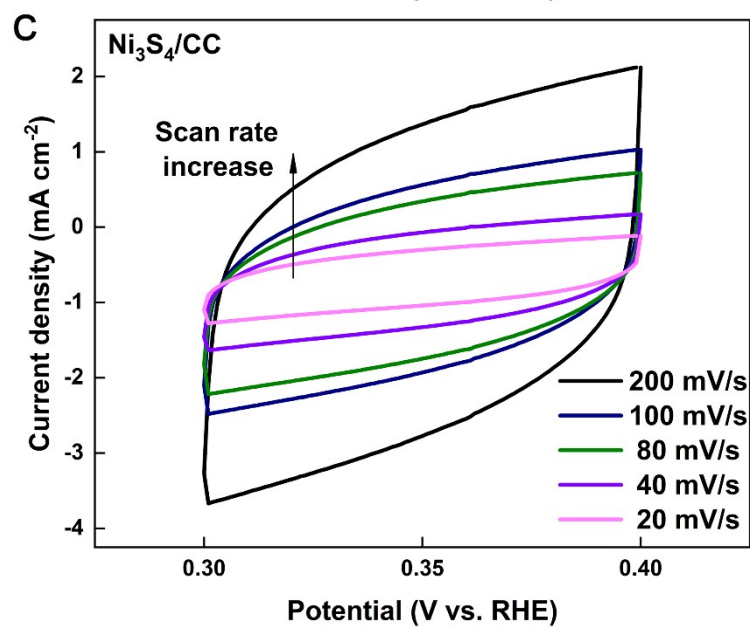

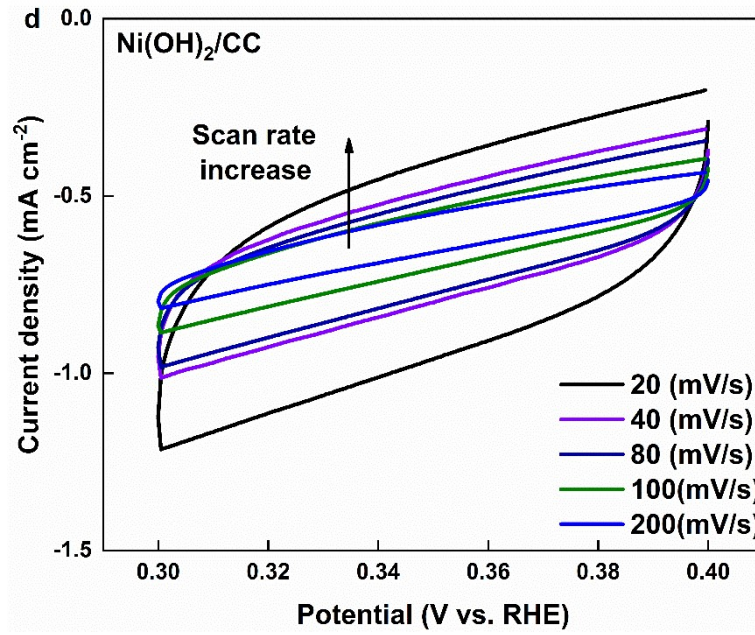

Figure S7. CV cycles at scan rates ranging from 20  $\text{mV s}^{-1}$  to 200  $\text{mV s}^{-1}$  of (a) 1T-MoS<sub>2</sub>/Ni<sub>3</sub>S<sub>4</sub>/CC, (b) 1T-MoS<sub>2</sub>/ CC, (c) Ni<sub>3</sub>S<sub>4</sub>/CC and (d) Ni(OH)<sub>2</sub>/CC.

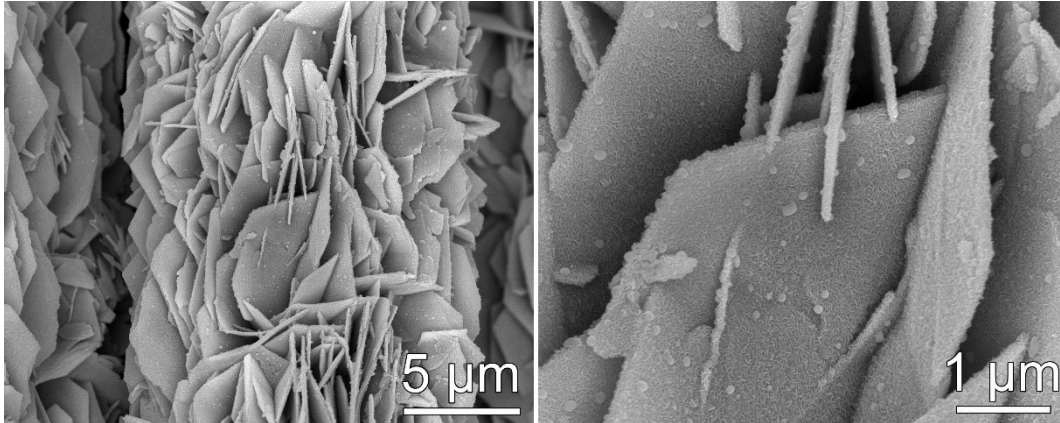

Figure S8. SEM image of 1T-MoS<sub>2</sub>/Ni<sub>3</sub>S<sub>4</sub>/CC after 40 h chronoamperometry test.

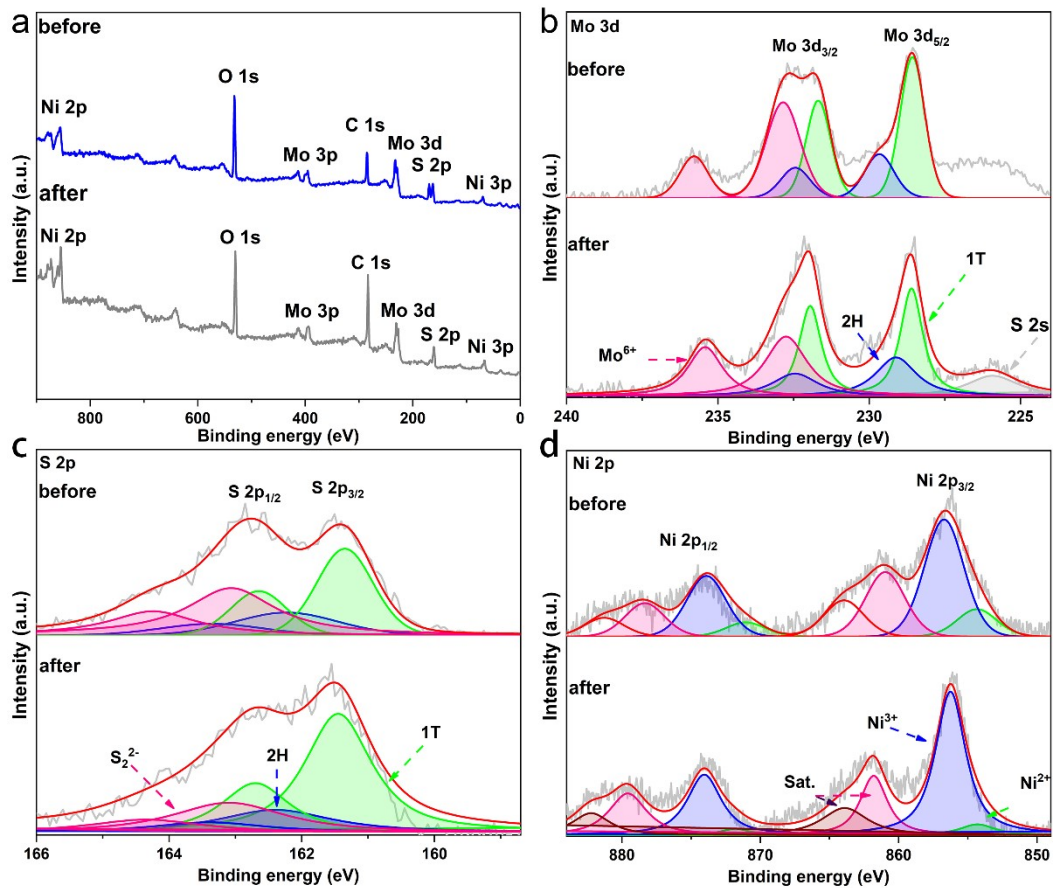

Figure S9. XPS of 1T-MoS<sub>2</sub>/Ni<sub>3</sub>S<sub>4</sub>/CC before and after 40 h chronoamperometry test. (a) Survey spectrum, and high-resolution spectra of (b) Mo 3d, (c) S 2p, and (d) Ni 2p.

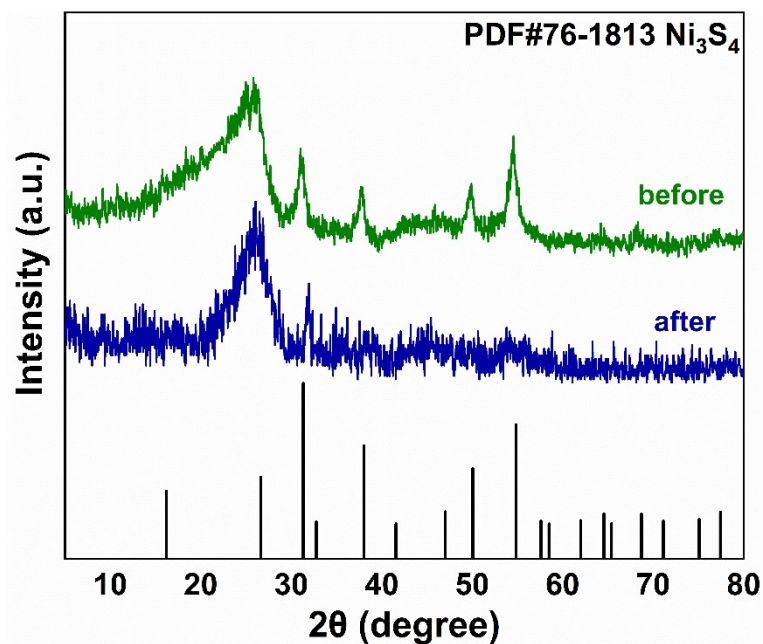

Figure S10. The XRD pattern of 1T-MoS<sub>2</sub>/Ni<sub>3</sub>S<sub>4</sub>/CC before and after 60 h chronoamperometry test.

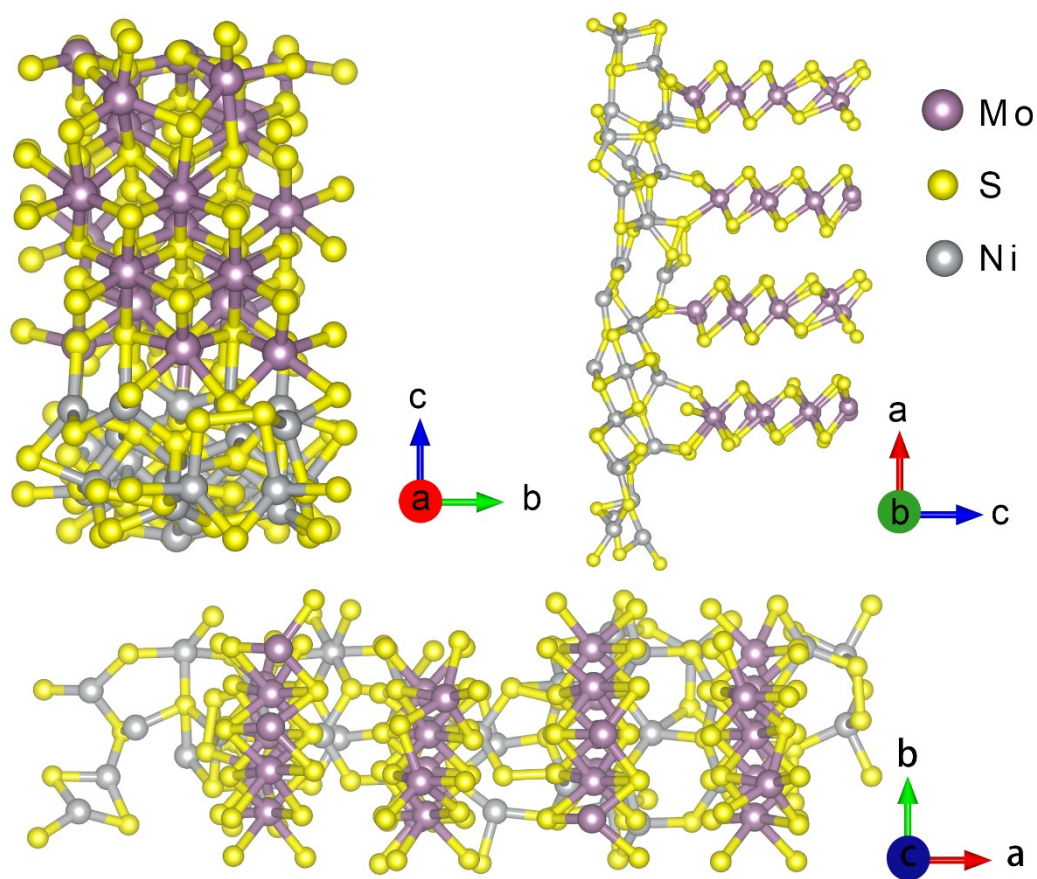

Figure S11. The optimal structure model of 1T-MoS<sub>2</sub>/Ni<sub>3</sub>S<sub>4</sub>.

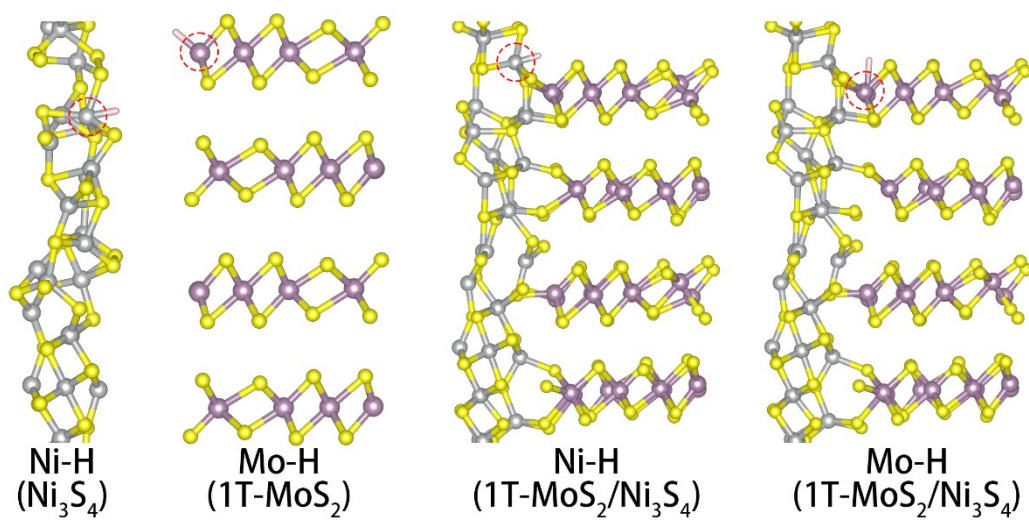

Figure S12. Structural models for hydrogen adsorption on Ni sites ( $\text{Ni}_3\text{S}_4$ ), Mo-edge sites ( $1\text{T-MoS}_2$ ), Ni and Mo-edge sites ( $1\text{T-MoS}_2/\text{Ni}_3\text{S}_4$ ).

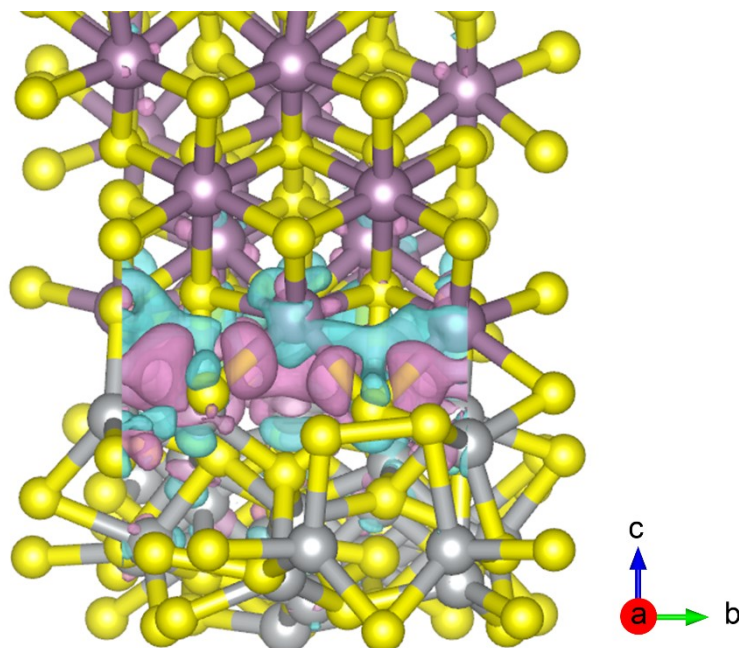

Figure S13. The deformation of the electronic density of  $1\text{T-MoS}_2/\text{Ni}_3\text{S}_4$  interfaces, in which the cyan/purple is surfaces correspond to negative/positive spin densities.

Table S1. The loading of the catalytically active substance on the carbon cloth calculated from ICP-OES results.

| Sample                               | Element | Concentration<br>(mg/L) | Loading<br>(mg/cm <sup>2</sup> ) |
|--------------------------------------|---------|-------------------------|----------------------------------|
| $\text{MoS}_2/\text{Ni}_3\text{S}_4$ | Mo      | 0.41                    | 0.41                             |
|                                      | Ni      | 0.35                    | 0.35                             |
|                                      | S       | 1.42                    | 1.42                             |
| $\text{Ni}(\text{OH})_2$             | Ni      | 2.16                    | 2.16                             |

Table S2. A comparison of the catalytic performance of  $1\text{T-MoS}_2/\text{Ni}_3\text{S}_4/\text{CC}$  and recently reported  $\text{MoS}_2$ -based HER catalysts in 1.0 M KOH.

| Samples | $\eta_{10}$ (mV) | Tafel slope | Ref. |
|---------|------------------|-------------|------|
|---------|------------------|-------------|------|



|                                                         |     | (mV dec <sup>-1</sup> ) |           |
|---------------------------------------------------------|-----|-------------------------|-----------|
| 1T-MoS <sub>2</sub> /Ni <sub>3</sub> S <sub>4</sub> /CC | 44  | 44                      | This work |
| MoS <sub>2</sub> /α-MoC                                 | 84  | 41                      | 1         |
| 1T-2H MoS <sub>2</sub> /CoS <sub>2</sub>                | 37  | 46                      | 2         |
| Ni-1T-MoS <sub>2</sub>                                  | 199 | 53                      | 3         |
| NiO@1T-MoS <sub>2</sub>                                 | 46  | 52                      | 4         |
| P-1T-CMS@CC                                             | 95  | 69                      | 5         |
| Co-MoS <sub>2</sub> /V <sub>2</sub> C@CC                | 70  | 99                      | 6         |
| Cu-MoS <sub>2</sub> @NF                                 | 72  | 68                      | 7         |
| Ni(OH) <sub>2</sub> @1T-MoS <sub>2</sub>                | 57  | 70                      | 8         |
| NWAs                                                    |     |                         |           |
| N-rGO-MoS <sub>2</sub> -<br>Ni(OH) <sub>2</sub>         | 129 | 86                      | 9         |
| CoS <sub>2</sub> -MoS <sub>2</sub> MSHSs                | 109 | 52                      | 10        |
| MoS <sub>2</sub> /NiS <sub>2</sub>                      | 62  | 50                      | 11        |
| CoMoNiS-NF-31                                           | 113 | 85                      | 12        |
| (Ni, Fe)S <sub>2</sub> @MoS <sub>2</sub>                | 130 | 101                     | 13        |
| Co-MoS <sub>2</sub> /BCCF-21                            | 48  | 52                      | 14        |
| Co <sub>3</sub> S <sub>4</sub> @MoS <sub>2</sub>        | 136 | 43                      | 15        |
| CoMoS                                                   | 97  | 70                      | 16        |
| 2.5H-PHNCMs                                             | 70  | 38                      | 17        |
| FeCoNi-HNTAs                                            | 58  | 38                      | 18        |
| MoS <sub>2</sub> -Ni <sub>3</sub> S <sub>2</sub> /NF    | 98  | 61                      | 19        |
| MoS <sub>2</sub> /Ni <sub>3</sub> S <sub>2</sub> @NF    | 110 | 83                      | 20        |

## Reference

1. Z. Cheng, Y. Xiao, W. Wu, X. Zhang, Q. Fu, Y. Zhao and L. Qu, ACS Nano, 2021, 61, 20210702.
2. P. Chang, T. Wang, Z. Liu, X. Wang, J. Zhang, H. Xiao, L. Guan and J. Tao, J. Mater. Chem. A, 2022, 10, 16115-16126.
3. G. Wang, G. Zhang, X. Ke, X. Chen, X. Chen, Y. Wang, G. Huang, J. Dong, S. Chu and M. Sui, Small, 2022, 18, e2107238.
4. Y. Huang, Y. Sun, X. Zheng, T. Aoki, B. Pattengale, J. Huang, X. He, W. Bian, S. Younan, N. Williams, J. Hu, J. Ge, N. Pu, X. Yan, X. Pan, L. Zhang, Y. Wei and J. Gu, Nat. Commun., 2019, 10, 982.
5. C. C. Gudal, U. N. Pan, D. R. Paudel, M. R. Kandel, N. H. Kim and J. H. Lee, ACS Appl. Mater. Inter., 2022, 14, 14492-14503.
6. Y. Chen, G. Meng, T. Yang, C. Chen, Z. Chang, F. Kong, H. Tian, X. Cui, X. Hou and J. Shi, Chem. Eng. J., 2022, 450, 138157.
7. B. Gao, Y. Zhao, X. Du, Y. Chen, B. Guan, Y. Li, Y. Li, S. Ding, H. Zhao, C. Xiao and Z. Song, J. Mater. Chem. A, 2021, 9, 8394-8400.
8. K. Wang, Z. Liu, Q. Gao, N. Li and K. Yu, Appl. Surf. Sci., 2022, 593, 153408.
9. S. Debata, S. Banerjee and P. K. Sharma, Electrochim. Acta, 2019, 303, 257-267.
10. V. Ganesan and J. Kim, Int. J. Hydrogen Energ., 2020, 45, 13290-13299.

11. J. Lin, P. Wang, H. Wang, C. Li, X. Si, J. Qi, J. Cao, Z. Zhong, W. Fei and J. Feng, *Adv. Sci.*, 2019, 6, 1900246.
12. Y. Yang, H. Yao, Z. Yu, S. M. Islam, H. He, M. Yuan, Y. Yue, K. Xu, W. Hao, G. Sun, H. Li, S. Ma, P. Zapol and M. G. Kanatzidis, *J Am. Chem. Soc.*, 2019, 141, 10417-10430.
13. Y. Liu, S. Jiang, S. Li, L. Zhou, Z. Li, J. Li and M. Shao, *Appl. Catal. B-Environ.*, 2019, 247, 107-114.
14. Q. Xiong, Y. Wang, P. F. Liu, L. R. Zheng, G. Wang, H. G. Yang, P. K. Wong, H. Zhang and H. Zhao, *Adv. Mater.*, 2018, 15, e1801450.
15. Y. Guo, J. Tang, Z. Wang, Y.-M. Kang, Y. Bando and Y. Yamauchi, *Nano Energy*, 2018, 47, 494-502.
16. J. Hou, B. Zhang, Z. Li, S. Cao, Y. Sun, Y. Wu, Z. Gao and L. Sun, *ACS Cata.*, 2018, 8, 4612-4621.
17. H. Li, S. Chen, Y. Zhang, Q. Zhang, X. Jia, Q. Zhang, L. Gu, X. Sun, L. Song and X. Wang, *Nat. Commun.*, 2018, 9, 2452.
18. H. Li, S. Chen, X. Jia, B. Xu, H. Lin, H. Yang, L. Song and X. Wang, *Nat. Commun.*, 2017, 8, 15377.
19. Y. Yang, K. Zhang, H. Lin, X. Li, H. C. Chan, L. Yang and Q. Gao, *ACS Cata.*, 2017, 7, 2357-2366.
20. J. Zhang, T. Wang, D. Pohl, B. Rellinghaus, R. Dong, S. Liu, X. Zhuang and X. Feng, *Angew Chem. Int. Ed. Engl.*, 2016, 55, 6702-6707.
